# Supplementary material for: Steroid hormones and human choriogonadotropin influence the distribution of alpha6-integrin and desmoplakin 1 in gland-like endometrial epithelial spheroids
Source: PubMed Central journal article supplement (PMC8134296; doi:10.1007/s00418-020-01960-z), 2021-01-27
Supplement: 418_2020_1960_MOESM1_ESM.pdf [file 418_2020_1960_MOESM1_ESM.pdf]

## Online Resource 1: Number of experiments and assessed spheroids

| IHC antibody                         | condition | 1 <sup>st</sup> experiment<br>[number of assessed<br>spheroids] | 2 <sup>nd</sup> experiment<br>[number of assessed<br>spheroids] | 3 <sup>rd</sup> experiment<br>[number of assessed<br>spheroids] | in total<br>[number of assessed<br>spheroids] | spheroids showing the described IHC patterns |       |
|--------------------------------------|-----------|-----------------------------------------------------------------|-----------------------------------------------------------------|-----------------------------------------------------------------|-----------------------------------------------|----------------------------------------------|-------|
|                                      |           |                                                                 |                                                                 |                                                                 |                                               | [total number]                               | [%]   |
| <b>Ki-67</b>                         | vehicle   | 6                                                               | 5                                                               | 7                                                               | 18                                            | 13                                           | 72,22 |
|                                      | E2        | 6                                                               | 5                                                               | 14                                                              | 25                                            | 20                                           | 80,00 |
|                                      | P4        | 4                                                               | 5                                                               | 9                                                               | 18                                            | 14                                           | 77,78 |
|                                      | MPA       | 4                                                               | 5                                                               | 10                                                              | 19                                            | 16                                           | 84,21 |
|                                      | hCG       | 6                                                               | 5                                                               | 12                                                              | 23                                            | 16                                           | 69,57 |
| <b>desmoplakin 1</b>                 | vehicle   | 9                                                               | 11                                                              | 16                                                              | 36                                            | 32                                           | 88,89 |
|                                      | E2        | 6                                                               | 6                                                               | 9                                                               | 21                                            | 20                                           | 95,24 |
|                                      | P4        | 5                                                               | 4                                                               | 7                                                               | 16                                            | 11                                           | 68,75 |
|                                      | MPA       | 7                                                               | 7                                                               | 11                                                              | 25                                            | 22                                           | 88,00 |
|                                      | hCG       | 4                                                               | 5                                                               | 11                                                              | 20                                            | 18                                           | 90,00 |
| <b><math>\alpha</math>6-integrin</b> | vehicle   | 4                                                               | 18                                                              | 12                                                              | 34                                            | 28                                           | 82,35 |
|                                      | E2        | 5                                                               | 10                                                              | 5                                                               | 20                                            | 16                                           | 80,00 |
|                                      | P4        | 4                                                               | 17                                                              | 7                                                               | 28                                            | 22                                           | 78,57 |
|                                      | MPA       | 5                                                               | 10                                                              | 7                                                               | 22                                            | 19                                           | 86,36 |
|                                      | hCG       | 4                                                               | 13                                                              | 8                                                               | 25                                            | 22                                           | 88,00 |
| <b><math>\beta</math>4-integrin</b>  | vehicle   | 16                                                              | 5                                                               | 11                                                              | 32                                            | 28                                           | 87,50 |
|                                      | E2        | 15                                                              | 7                                                               | 9                                                               | 31                                            | 24                                           | 77,42 |
|                                      | P4        | 10                                                              | 4                                                               | 10                                                              | 24                                            | 22                                           | 91,67 |
|                                      | MPA       | 16                                                              | 10                                                              | 9                                                               | 35                                            | 23                                           | 65,71 |
|                                      | hCG       | 11                                                              | 6                                                               | 9                                                               | 26                                            | 23                                           | 88,46 |

Abbreviations: IHC = immunohistochemistry; E2 = 17 $\beta$ -estradiol; P4 = progesterone; MPA = medroxyprogesterone acetate; hCG = human choriogonadotropin.
