# Supplementary material for: Steroid hormones and human choriogonadotropin influence the distribution of alpha6-integrin and desmoplakin 1 in gland-like endometrial epithelial spheroids
Source: PubMed Central journal article supplement (PMC8134296; doi:10.1007/s00418-020-01960-z), 2021-01-27
Supplement: 418_2020_1960_MOESM2_ESM.pdf [file 418_2020_1960_MOESM2_ESM.pdf]

Online Resource 2: Summary of changes in hormonally stimulated Ishikawa cell spheroids

| IHC antibody                         | condition | nuclear staining | subapically concentrated lateral staining | equally distributed lateral staining | basal membrane staining |
|--------------------------------------|-----------|------------------|-------------------------------------------|--------------------------------------|-------------------------|
| <b>Ki-67</b>                         | vehicle   | ++               | -                                         | -                                    | -                       |
|                                      | E2        | +++              | -                                         | -                                    | -                       |
|                                      | P4        | +                | -                                         | -                                    | -                       |
|                                      | MPA       | +                | -                                         | -                                    | -                       |
|                                      | hCG       | ++               | -                                         | -                                    | -                       |
| <b>desmoplakin 1</b>                 | vehicle   | -                | +                                         | +                                    | -                       |
|                                      | E2        | -                | ++                                        | -                                    | -                       |
|                                      | P4        | -                | -                                         | ++                                   | -                       |
|                                      | MPA       | -                | -                                         | ++                                   | -                       |
|                                      | hCG       | -                | +                                         | ++                                   | -                       |
| <b><math>\alpha</math>6-integrin</b> | vehicle   | -                | -                                         | -                                    | ++                      |
|                                      | E2        | -                | -                                         | -                                    | ++                      |
|                                      | P4        | -                | -                                         | ++                                   | +                       |
|                                      | MPA       | -                | -                                         | ++                                   | +                       |
|                                      | hCG       | -                | -                                         | ++                                   | +                       |
| <b><math>\beta</math>4-integrin</b>  | vehicle   | -                | -                                         | +                                    | ++                      |
|                                      | E2        | -                | -                                         | +                                    | ++                      |
|                                      | P4        | -                | -                                         | +                                    | ++                      |
|                                      | MPA       | -                | -                                         | +                                    | ++                      |
|                                      | hCG       | -                | -                                         | +                                    | ++                      |

Strength of staining and main localization was classified to: “+” low, “++” middle and “+++” strong. “-“ means “no staining”.

Abbreviations: IHC = immunohistochemistry; E2 = 17 $\beta$ -estradiol; P4 = progesterone; MPA = medroxyprogesterone acetate; hCG = human choriogonadotropin.
